# Supplementary material for: Overview of distinct 5-methylcytosine profiles of messenger RNA in normal and knock-down NSUN2 colorectal cancer cells
Source: Frontiers journal article supplement (doi:10.3389/fgene.2023.1121063), 2023-04-24
Supplement: Data_Sheet_1.ZIP [file Data_Sheet_1.ZIP]

**Supplementary data for**

**Overview of distinct 5-methylcytosine profiles of messenger RNA in normal and knock-down NSUN2 colorectal cancer cells**

**Supplementary table 1 Sequences for shRNA**

| **Name** | **Sequences (5’ – 3’)** |
| --- | --- |
| sh-NSUN2 | CACGTGTTCACTAAACCCTAT |
