# Supplementary figures and images for: Overview of distinct 5-methylcytosine profiles of messenger RNA in normal and knock-down NSUN2 colorectal cancer cells
Source: Frontiers journal article supplement (doi:10.3389/fgene.2023.1121063), 2023-04-24

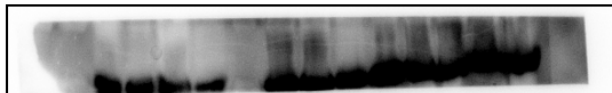

GAPDH

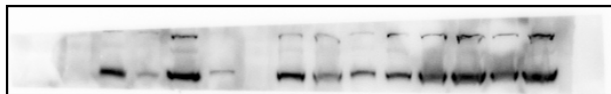

NSUN2

Supplement: Data_Sheet_1.ZIP [file Data_Sheet_1.ZIP]
